# Supplementary material for: Specific microRNA Signature Kinetics in Porphyromonas gingivalis-Induced Periodontitis
Source: MDPI journal article supplement (doi:10.3390/ijms24032327), 2023-01-24
Supplement: s1 [file s1]

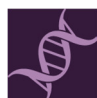

Article

# Specific microRNA Signature Kinetics in *Porphyromonas gingivalis*-Induced Periodontitis

Chairmandurai Aravindraj<sup>1,†</sup>, Krishna Mukesh Vekariya<sup>1</sup>, Ruben Botello-Escalante<sup>1</sup>, Shaik O. Rahaman<sup>2</sup>, Edward K. L. Chan<sup>3</sup> and Lakshmya Kesavalu<sup>1,3\*</sup>

<sup>1</sup> Department of Periodontology, College of Dentistry, University of Florida, Gainesville, FL 32610, USA; Aravindraj.Chairmandurai@neurology.ufl.edu (C.A.); kvekariya@ufl.edu (K.M.V.); rbotelloescalante@ufl.edu (R.B.-E.)

<sup>2</sup> Department of Nutrition and Food Science, University of Maryland, College Park, MD 20742, USA; srahaman@umd.edu

<sup>3</sup> Department of Oral Biology, College of Dentistry, University of Florida, Gainesville, FL 32610, USA; echan@dental.ufl.edu

\* Correspondence: kesavalu@dental.ufl.edu; Tel.: +1-352-273-6500

† Present address: Department of Neurology, College of Medicine, University of Florida, Gainesville, FL 32610, USA

## Supplementary Information:

**Table S1.** List of upregulated miRNAs at 8-weeks of infection compared to sham-infection.

| miRs        | Fold Change | p-Value  |
|-------------|-------------|----------|
| miR-804     | 1.57        | 0.009465 |
| miR-690     | 1.53        | 0.007031 |
| miR-1224    | 1.4         | 0.013375 |
| miR-31      | 1.37        | 0.034075 |
| miR-133b    | 1.36        | 0.03893  |
| miR-185     | 1.32        | 0.000534 |
| miR-19b     | 1.31        | 0.000122 |
| miR-22      | 1.31        | 0.009126 |
| miR-193     | 1.29        | 0.006863 |
| miR-1198    | 1.27        | 0.001943 |
| miR-154     | 1.27        | 0.04589  |
| miR-152     | 1.26        | 0.031135 |
| miR-423-3p  | 1.26        | 0.044217 |
| miR-125b-5p | 1.24        | 0.02166  |
| miR-191     | 1.23        | 0.013163 |
| miR-107     | 1.22        | 0.022686 |
| miR-103     | 1.21        | 0.004192 |
| miR-322     | 1.19        | 0.019203 |
| miR-30d     | 1.17        | 0.042862 |
| miR-301a    | 1.15        | 0.041072 |
| miR-15a     | 1.15        | 0.046356 |
| miR-30c     | 1.15        | 0.049249 |
| miR-30e     | 1.13        | 0.00518  |
| miR-151-5p  | 1.13        | 0.02108  |
| miR-28      | 1.13        | 0.041907 |
| miR-151-3p  | 1.11        | 0.030216 |

**Table S2.** List of downregulated miRNAs during 8-weeks infection compared to sham-infection.

| miRs                | Fold Change | p-Value  |
|---------------------|-------------|----------|
| miR-1902            | -1.67       | 0.004943 |
| miR-1937a+miR-1937b | -1.65       | 0.000118 |
| mmu-let-7f          | -1.56       | 4.04E-05 |
| mmu-let-7c          | -1.49       | 0.000261 |
| mmu-let-7a          | -1.48       | 0.000101 |
| miR-98              | -1.46       | 3.85E-05 |
| miR-127             | -1.45       | 3.04E-05 |
| miR-218             | -1.39       | 0.005713 |
| miR-144             | -1.36       | 0.036176 |
| miR-2133            | -1.32       | 0.034422 |
| miR-720             | -1.27       | 0.001453 |
| miR-29b             | -1.25       | 0.00815  |
| miR-29a             | -1.18       | 0.049705 |
| let-7g              | -1.1        | 0.015144 |

**Table S3.** List of upregulated and downregulated miRNAs in *P. gingivalis*-16-weeks infection compared to sham-infection.

| Upregulated miRNA   |             |          |
|---------------------|-------------|----------|
| miRs                | Fold Change | p-Value  |
| miR-30d             | 1.11        | 0.046212 |
| miR-103             | 1.13        | 0.044262 |
| miR-145             | 1.14        | 0.018223 |
| miR-195             | 1.18        | 0.028636 |
| miR-24              | 1.19        | 0.020169 |
| miR-365             | 1.22        | 0.045178 |
| miR-99b             | 1.24        | 0.001738 |
| Downregulated miRNA |             |          |
| miR-302b            | -1.12       | 0.023894 |

**Table S4.** Comparison of upregulated miRNAs between 8- weeks and 16-weeks infection.

| miRs                | Fold change | p-value    |
|---------------------|-------------|------------|
| miR-1937a+miR-1937b | 1.54        | 0.00037449 |
| miR-720             | 1.35        | 0.00012091 |
| miR-30b             | 1.25        | 0.01897502 |
| miR-1937c           | 1.27        | 0.02212542 |
| miR-361             | 1.3         | 0.03815099 |
| miR-100             | 1.12        | 0.03700248 |
| miR-410             | 1.19        | 0.00779958 |
| miR-495             | 1.23        | 0.04007289 |
| miR-145             | 1.22        | 0.04251919 |
| mmu-let-7f          | 1.24        | 0.0456108  |
| miR-26b             | 1.11        | 0.04631309 |

**Table S5.** Comparison of downregulated miRNAs in *P. gingivalis* infection between 8- and 16-weeks.

| miRs            | Fold Change | p-Value    |
|-----------------|-------------|------------|
| miR-804         | -1.64       | 0.01060972 |
| miR-m107-1-3p   | -1.54       | 0.02780248 |
| miR-485         | -1.54       | 0.04032774 |
| miR-1942        | -1.52       | 0.03745166 |
| miR-883b-5p     | -1.52       | 0.03901862 |
| miR-669j        | -1.52       | 0.03922487 |
| miR-670         | -1.51       | 0.02803583 |
| miR-1941-5p     | -1.5        | 0.04519783 |
| miR-3474        | -1.49       | 0.03789401 |
| miR-M23-1-5p    | -1.49       | 0.03807786 |
| miR-501-5p      | -1.48       | 0.03058914 |
| miR-1190        | -1.48       | 0.04250021 |
| miR-669i        | -1.47       | 0.03065781 |
| miR-105         | -1.47       | 0.03368492 |
| miR-1898        | -1.47       | 0.04155007 |
| miR-464         | -1.47       | 0.04410116 |
| miR-1903        | -1.47       | 0.04909801 |
| miR-468         | -1.47       | 0.04998101 |
| miR-493         | -1.46       | 0.0308734  |
| miR-1963        | -1.45       | 0.03750653 |
| miR-1197        | -1.45       | 0.04162274 |
| miR-207         | -1.45       | 0.04953777 |
| miR-384-3p      | -1.44       | 0.03375416 |
| miR-1962        | -1.43       | 0.03902775 |
| miR-717         | -1.43       | 0.03916274 |
| miR-708         | -1.43       | 0.04709437 |
| miR-370         | -1.43       | 0.04717626 |
| miR-34b-3p      | -1.42       | 0.03502887 |
| miR-362-3p      | -1.4        | 0.00015343 |
| miR-300         | -1.37       | 0.0451478  |
| miR-154         | -1.35       | 0.03105967 |
| miR-676         | -1.34       | 0.03164852 |
| miR-423-3p      | -1.32       | 0.04086319 |
| miR-329         | -1.27       | 0.02862548 |
| miR-425         | -1.27       | 0.03722069 |
| miR-20a+miR-20b | -1.25       | 0.01648322 |
| miR-200c        | -1.25       | 0.03575851 |

**Table S6.** List of predicted miRNAs and their number of target genes involved in *P. gingivalis*-mediated invasion of epithelial cells.

| miRNAs      | Fold Change | p-Value  | # of Genes | Target Genes                                                                                                                       |
|-------------|-------------|----------|------------|------------------------------------------------------------------------------------------------------------------------------------|
| miR-31      | 1.37        | 0.034075 | 11         | <i>Pik3r1, Cblb, Cltc, Was1, Arheg26, Dock1, Gab1, Vcl, Met, Cdc42, Arpc5</i>                                                      |
| miR-133b    | 1.36        | 0.03893  | 6          | <i>Bcar1, Sept8, Was1, Cd2ap, Arpc5</i>                                                                                            |
| miR-185     | 1.32        | 0.000534 | 3          | <i>Pxn, Ctnna1, Fn1</i>                                                                                                            |
| miR-19b     | 1.31        | 0.000122 | 9          | <i>Pik3r3, Cltc, Was1, Src, Actb, Arpc1a, Crk, Itgb1, Arpc5</i>                                                                    |
| miR-22      | 1.31        | 0.009126 | 13         | <i>Cb1, Pik3r1, Pik3r3, Ctnna1, Bcar1, Sept8, Dnm1, Wasf2, Rhoa, Actb, Crk1, Rac1, Cav3</i>                                        |
| miR-154     | 1.27        | 0.04589  | 2          | <i>Arpc4, Gab1</i>                                                                                                                 |
| miR-152     | 1.26        | 0.031135 | 11         | <i>Pik3r1, Pik3r3, Cblb, Cltc, Clta, Itga5, Actb, Arpc4, Gab1, Met, Cdc42</i>                                                      |
| miR-125b-5p | 1.24        | 0.02166  | 11         | <i>Pik3r3, Bcar1, Sept8, Wasf2, Ptk2, Pik3r2, Itga5, Fn1, Crk, Itgb1, Cdc42</i>                                                    |
| miR-191     | 1.23        | 0.013163 | 1          | <i>Pik3r1</i>                                                                                                                      |
| miR-107     | 1.22        | 0.022686 | 2          | <i>Cltc, Rac1</i>                                                                                                                  |
| miR-103     | 1.21        | 0.004192 | 2          | <i>Cltc, Rac1</i>                                                                                                                  |
| miR-322     | 1.19        | 0.019203 | 19         | <i>Pik3r3, Ctnna1, Bcar1, Sept8, Dnm1, Cltc, Was1, Dnm2, Sept2, Itga5, Actb, Crk1, Fn1, Elmo2, Vcl, Sept11, Arpc1b, Met, Cdc42</i> |
| miR-30d     | 1.17        | 0.042862 | 10         | <i>Pik3r1, Ctnna1, Cblb, Sept8, Was1, Sept2, Rac1, Crk, Itgb1, Pik3cd</i>                                                          |
| miR-301a    | 1.15        | 0.041072 | 8          | <i>Cblb, Cltc, Was1, Clta, Pik3cb, Arpc1a, Met, Cav2</i>                                                                           |
| miR-15a     | 1.15        | 0.046356 | 9          | <i>Pik3r1, Cltc, Was1, Sept2, Actb, Crk, Cd2ap, Elmo1, Cdc42</i>                                                                   |
| miR-30c     | 1.15        | 0.049249 | 10         | <i>Pik3r1, Ctnna1, Cblb, Sept8, Was1, Sept2, Rac1, Crk, Itgb1, Pik3cd</i>                                                          |
| miR-30e     | 1.13        | 0.00518  | 10         | <i>Pik3r1, Ctnna1, Cblb, Sept8, Was1, Sept2, Rac1, Crk, Itgb1, Pik3cd</i>                                                          |
| miR-24      | 1.19        | 0.020169 | 2          | <i>Cblb, Cltc</i>                                                                                                                  |

Eighteen miRNAs were found to be involved in the bacterial invasion of epithelial cells in mice mandibles infected with *P. gingivalis*. miR-322 targets and regulate 19 genes that are involved in bacterial invasion of epithelial cells.

**Table S7.** Distribution of *P. gingivalis* genomic DNA of periodontal bacteria to distal organs.

| Monobacterial Infection     | Positive Systemic Tissue Samples (n=5 Males and 5 Females) |       |      |       |       |        |        |
|-----------------------------|------------------------------------------------------------|-------|------|-------|-------|--------|--------|
|                             | Sex (M/F)                                                  | Heart | Lung | Brain | Liver | Kidney | Spleen |
| <i>P. gingivalis</i> (16-W) | M                                                          | 0     | 0    | 0     | 0     | 0      | 0      |
|                             | F                                                          | 1     | 0    | 1     | 0     | 0      | 0      |
